# Supplementary material
Source: PubMed Central journal article supplement (PMC4262677)
Supplement: NIHMS638340-supplement-Supp_FigureS1___TableS1-S5.pdf [file NIHMS638340-supplement-Supp_FigureS1___TableS1-S5.pdf]

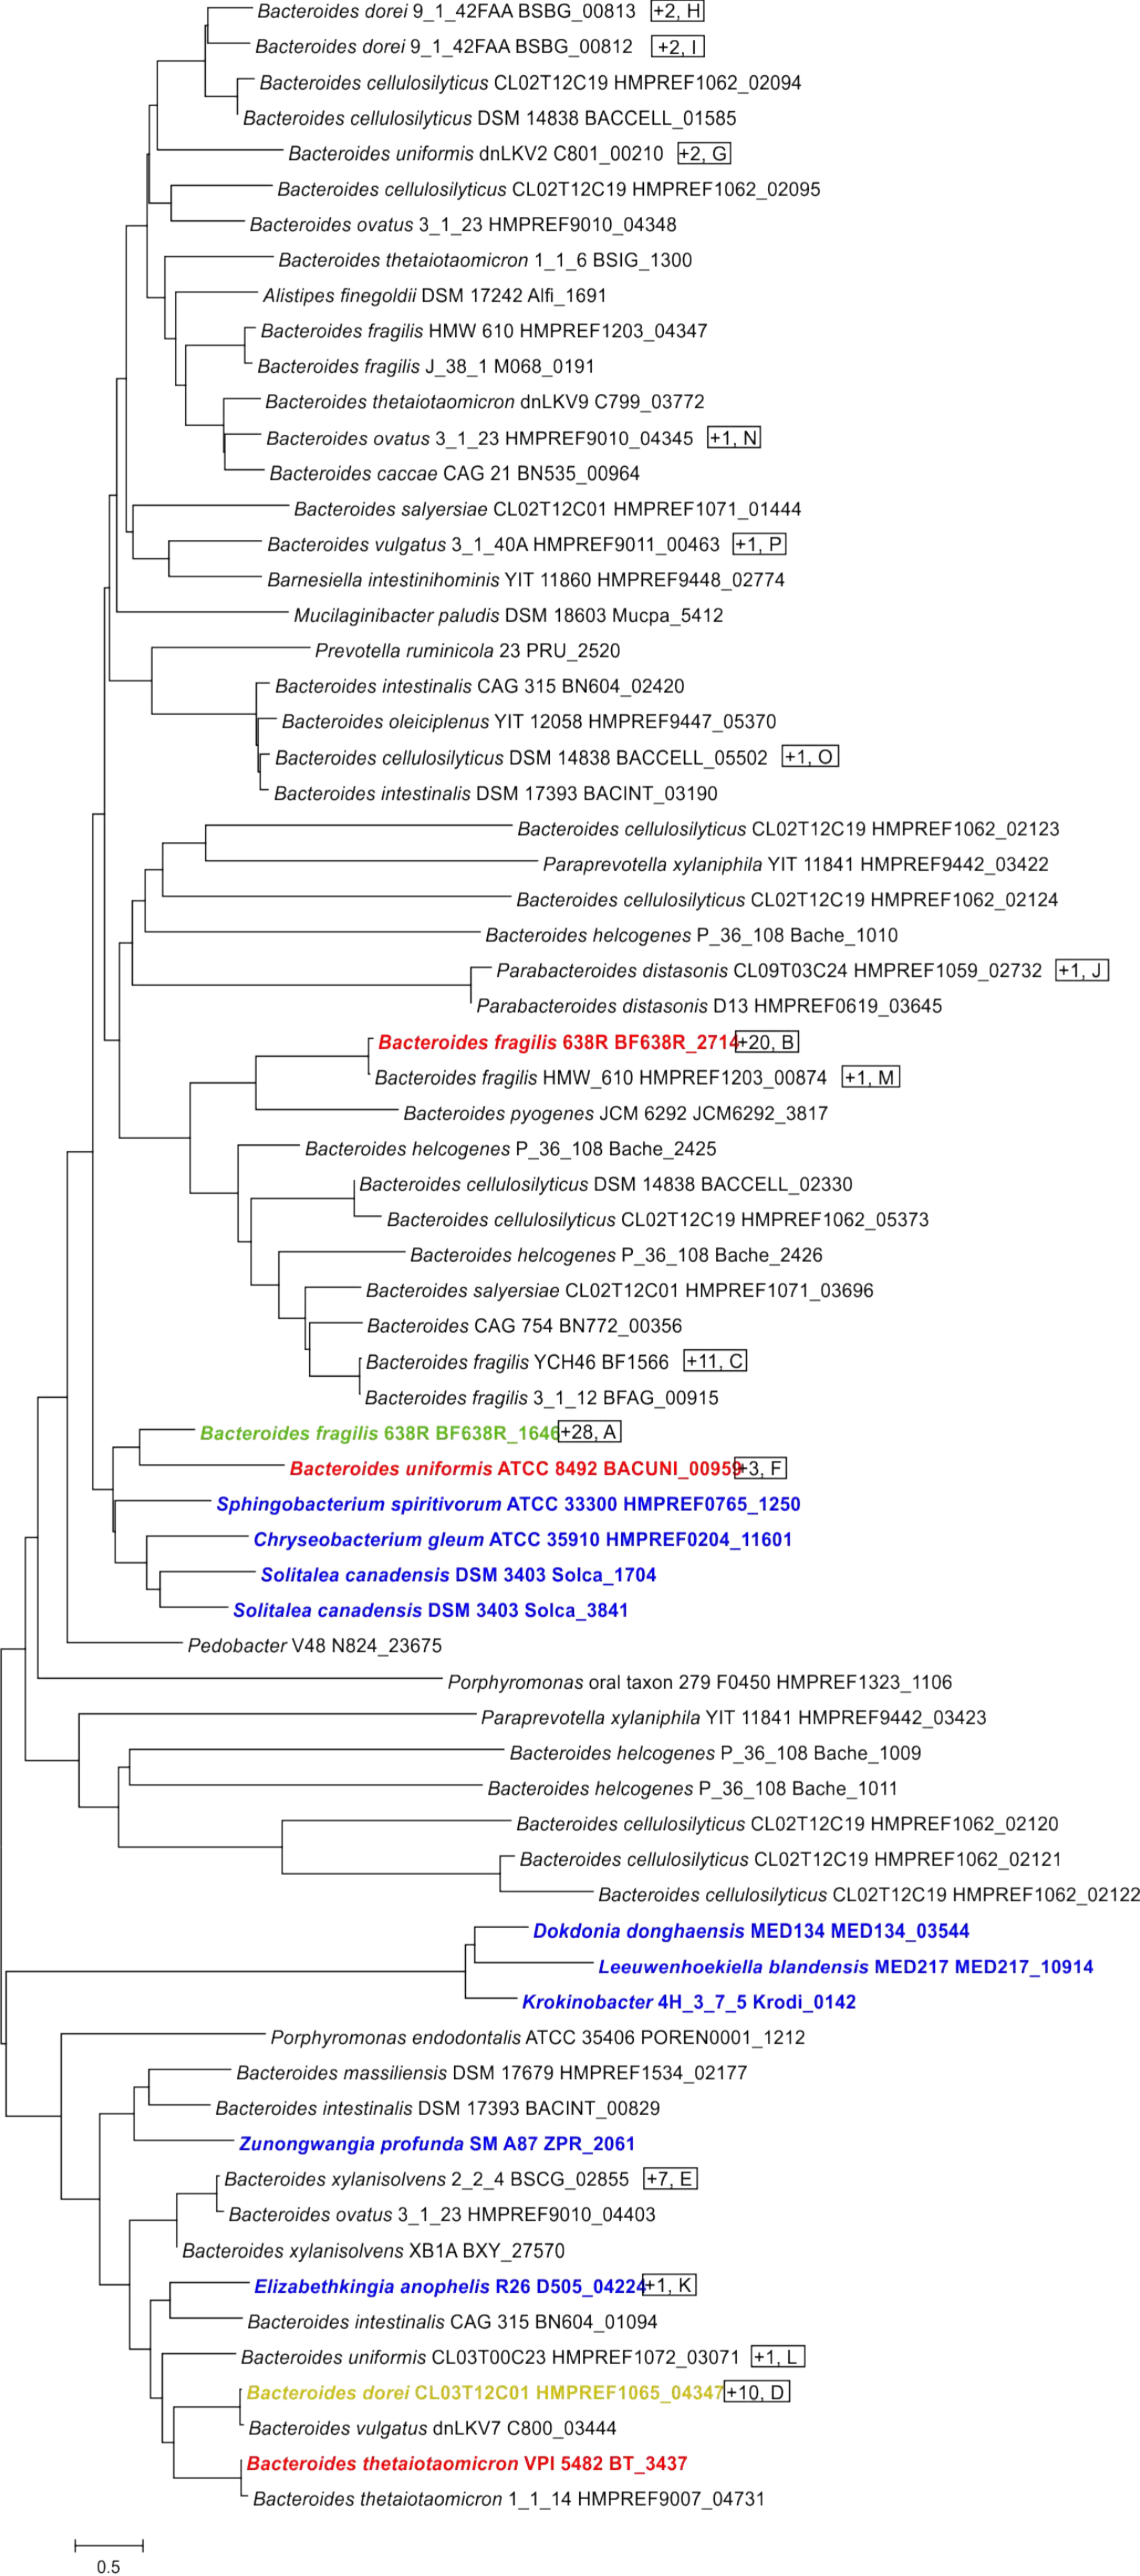

**Figure S1.** Phylogenetic tree of the 163 MACPF-containing proteins encoded by Bacteroidetes/Chlorobi species. BSAP-1, the subject of this study, is highlighted in green font. Those in blue font are from non-Bacteroidia classes including Sphingobacteria, Flavobacteria, and Chlorobia. Those in red font were subsequently analyzed for growth inhibitory activity as shown in Table S4. Yellow font represents those present on a mobile genetic element transferred between Bacteroides strains co-resident in the human gut. Only one protein is listed for each orthologous protein clustering at 99% similarity with the number and letter in the preceding box listing the number of strains and cluster where each strain/gene can be found in Table S3. Evolutionary distance represents the number of amino acid substitutions per site.

Table S1 – Ability of *B. fragilis* strains to inhibit growth of strain NCTC 9343 in the agar spot overlay assay

|    |            | Growth inhibition of strain NCTC 9343 |
|----|------------|---------------------------------------|
| 1  | 638R       | +                                     |
| 2  | 23745      | +                                     |
| 3  | B20        | +                                     |
| 4  | 13141      | -                                     |
| 5  | CM13       | -                                     |
| 6  | 379        | +                                     |
| 7  | B35        | +                                     |
| 8  | B127       | -                                     |
| 9  | 26877      | -                                     |
| 10 | VPI-13784  | -                                     |
| 11 | LM2        | +                                     |
| 12 | 1284-2     | -                                     |
| 13 | 17905      | -                                     |
| 14 | US365      | -                                     |
| 15 | 12905      | -                                     |
| 16 | 2429       | -                                     |
| 17 | US2244     | +                                     |
| 18 | B124       | +                                     |
| 19 | 419        | +                                     |
| 20 | LM8        | +                                     |
| 21 | B16        | +                                     |
| 22 | LM16       | -                                     |
| 23 | LM2        | +                                     |
| 24 | 1277476    | -                                     |
| 25 | 1279-2     | +                                     |
| 26 | TAL2480    | -                                     |
| 27 | 1279155-I  | -                                     |
| 28 | CM11       | -                                     |
| 29 | US1206     | -                                     |
| 30 | B117       | +                                     |
| 31 | LM46       | +                                     |
| 32 | B272       | +                                     |
| 33 | 38310      | +                                     |
| 34 | 1286265-I  | -                                     |
| 35 | IL89375-II | +                                     |
| 36 | 1285531-I  | -                                     |
| 37 | B110       | +                                     |
| 38 | US326      | -                                     |
| 39 | CM3        | +                                     |
| 40 | CL03T12C07 | -                                     |
| 41 | CL05T12C13 | -                                     |
| 42 | CL07T12C05 | +                                     |

+ sensitive (growth inhibition)  
 - no growth inhibition

**Table S2.** Distribution of the 324 proteins with a MACPF domain among the 15,948 sequenced bacterial genomes collected

| phylum<br>(# genomes with a MACPF protein/total # genomes in phylum) | genome                                  | genome bioproject accession | MACPF-encoding gene   |
|----------------------------------------------------------------------|-----------------------------------------|-----------------------------|-----------------------|
| Acidobacteria (1/9)                                                  | Terriglobus roseus DSM 18391            | PRJNA63509                  | Terro_2974            |
| Actinobacteria (2/1970)                                              | Clavibacter michiganensis NCPPB 382     | PRJNA19643                  | CMM_2382              |
|                                                                      | Nocardia seriolae N 2927                | PRJDB1598                   | NS07_contig00091-0002 |
| Bacteroidetes (106/466)                                              | Alistipes finegoldii DSM 17242          | PRJNA40775                  | Alfi_1691             |
|                                                                      | Bacteroides 1 1 14                      | PRJNA38765                  | HMPREF9007_04731      |
|                                                                      | Bacteroides 1 1 30                      | PRJNA41955                  | HMPREF0127_02494      |
|                                                                      | Bacteroides 1 1 6                       | PRJNA32435                  | BSIG_1300             |
|                                                                      | Bacteroides 2 1 16                      | PRJNA38347                  | HMPREF0101_01895      |
|                                                                      | Bacteroides 2 1 22                      | PRJNA38349                  | HMPREF0102_00396      |
|                                                                      | Bacteroides 2 1 56FAA                   | PRJNA40013                  | HMPREF1018_01740      |
|                                                                      |                                         |                             | HMPREF1018_02853      |
|                                                                      | Bacteroides 2 2 4                       | PRJNA32439                  | BSCG_02855            |
|                                                                      | Bacteroides 20 3                        | PRJNA38767                  | HMPREF9008_02040      |
|                                                                      | Bacteroides 3 1 23                      | PRJNA38771                  | HMPREF9010_04345      |
|                                                                      |                                         |                             | HMPREF9010_04348      |
|                                                                      |                                         |                             | HMPREF9010_04403      |
|                                                                      | Bacteroides 3 1 33FAA                   | PRJNA38353                  | HMPREF0105_2069       |
|                                                                      | Bacteroides 3 1 40A                     | PRJNA38773                  | HMPREF9011_00463      |
|                                                                      | Bacteroides 3 2 5                       | PRJNA32441                  | BSHG_0134             |
|                                                                      | Bacteroides 4 1 36                      | PRJNA39357                  | HMPREF1007_00197      |
|                                                                      | Bacteroides 9 1 42FAA                   | PRJNA32445                  | BSBG_00812            |
|                                                                      |                                         |                             | BSBG_00813            |
|                                                                      | Bacteroides caccae CAG 21               | PRJEB759                    | BN535_00964           |
|                                                                      | Bacteroides CAG 754                     | PRJEB996                    | BN772_00356           |
|                                                                      | Bacteroides cellulosilyticus CL02T12C19 | PRJNA64803                  | HMPREF1062_02094      |
|                                                                      |                                         |                             | HMPREF1062_02095      |
|                                                                      |                                         |                             | HMPREF1062_02120      |
|                                                                      |                                         |                             | HMPREF1062_02121      |
|                                                                      |                                         |                             | HMPREF1062_02122      |
|                                                                      |                                         |                             | HMPREF1062_02123      |
|                                                                      |                                         |                             | HMPREF1062_02124      |
|                                                                      |                                         |                             | HMPREF1062_02883      |
|                                                                      |                                         |                             | HMPREF1062_05373      |
|                                                                      | Bacteroides cellulosilyticus DSM 14838  | PRJNA30027                  | BACCELL_01585         |

|                                  |             |                    |
|----------------------------------|-------------|--------------------|
|                                  |             | BACCELL_02330      |
|                                  |             | BACCELL_05502      |
| Bacteroides D1                   | PRJNA32447  | BSAG_00140         |
| Bacteroides D20                  | PRJNA38355  | HMPREF0969_01421   |
| Bacteroides D22                  | PRJNA41953  | HMPREF0106_01001   |
|                                  |             | HMPREF0106_02882   |
| Bacteroides dorei CL03T12C01     | PRJNA64809  | HMPREF1065_02384   |
|                                  |             | HMPREF1065_02385   |
|                                  |             | HMPREF1065_04347   |
| Bacteroides eggerthii 1 2 48FAA  | PRJNA61869  | HMPREF1016_03647   |
| Bacteroides faecis MAJ27         | PRJNA72171  | BfaeM_010100023705 |
| Bacteroides fragilis 1007 1 F 10 | PRJNA206138 | M104_2757          |
|                                  |             | M104_4085          |
| Bacteroides fragilis 1007 1 F 5  | PRJNA206182 | M148_1670          |
|                                  |             | M148_2852          |
| Bacteroides fragilis 1007 1 F 6  | PRJNA206183 | M149_1805          |
|                                  |             | M149_2962          |
| Bacteroides fragilis 1007 1 F 7  | PRJNA206135 | M100_1591          |
|                                  |             | M100_2810          |
| Bacteroides fragilis 1007 1 F 8  | PRJNA206136 | M101_2609          |
| Bacteroides fragilis 1009 4 F 10 | PRJNA206140 | M106_1597          |
|                                  |             | M106_1841          |
| Bacteroides fragilis 1009 4 F 7  | PRJNA206139 | M105_2100          |
|                                  |             | M105_3134          |
| Bacteroides fragilis 2 F 2 4     | PRJNA206111 | M076_1635          |
| Bacteroides fragilis 2 F 2 5     | PRJNA206112 | M077_1747          |
| Bacteroides fragilis 2 F 2 7     | PRJNA206113 | M078_1667          |
| Bacteroides fragilis 3 1 12      | PRJNA32433  | BFAG_00915         |
|                                  |             | BFAG_00974         |
|                                  |             | BFAG_03570         |
| Bacteroides fragilis 3 F 2 6     | PRJNA206178 | M144_1629          |
|                                  |             | M144_2717          |
| Bacteroides fragilis 3397 N2     | PRJNA206143 | M109_2574          |
| Bacteroides fragilis 3397 T10    | PRJNA206115 | M080_2450          |
| Bacteroides fragilis 3397 T14    | PRJNA206142 | M108_2648          |
| Bacteroides fragilis 34 F 2 13   | PRJNA206179 | M145_1554          |
| Bacteroides fragilis 3719 A10    | PRJNA206150 | M116_1647          |
| Bacteroides fragilis 3719 T6     | PRJNA206149 | M115_1539          |
| Bacteroides fragilis 3725 D9 v   | PRJNA206141 | M107_2338          |
|                                  |             | M107_2399          |
|                                  |             | M107_2891          |

|                                  |             |                  |
|----------------------------------|-------------|------------------|
| Bacteroides fragilis 3783N1 8    | PRJNA206154 | M120_1906        |
| Bacteroides fragilis 3976T8      | PRJNA206157 | M123_1651        |
|                                  |             | M123_1767        |
| Bacteroides fragilis 3986 N B 22 | PRJNA206148 | M114_1392        |
| Bacteroides fragilis 3986 T B 13 | PRJNA206146 | M112_1592        |
| Bacteroides fragilis 3986 T B 9  | PRJNA206118 | M083_1493        |
| Bacteroides fragilis 3986T B 10  | PRJNA206145 | M111_4148        |
| Bacteroides fragilis 3996 N B 6  | PRJNA206114 | M079_1648        |
|                                  |             | M079_2797        |
| Bacteroides fragilis 3998T B 3   | PRJNA206159 | M125_2032        |
| Bacteroides fragilis 638R        | PRJNA50405  | BF638R_1646      |
|                                  |             | BF638R_2714      |
| Bacteroides fragilis B1 UDC16 1  | PRJNA206104 | M069_1710        |
|                                  |             | M069_1772        |
|                                  |             | M069_5973        |
| Bacteroides fragilis CL07T00C01  | PRJNA64819  | HMPREF1055_00045 |
|                                  |             | HMPREF1055_01288 |
| Bacteroides fragilis CL07T12C05  | PRJNA64821  | HMPREF1056_01634 |
|                                  |             | HMPREF1056_02880 |
| Bacteroides fragilis DS 71       | PRJNA206108 | M073_1472        |
| Bacteroides fragilis HMW 610     | PRJNA71525  | HMPREF1203_00874 |
|                                  |             | HMPREF1203_04347 |
| Bacteroides fragilis HMW 615     | PRJNA71527  | HMPREF1204_03336 |
| Bacteroides fragilis HMW 616     | PRJNA71529  | HMPREF1205_04263 |
| Bacteroides fragilis I 1345      | PRJNA206101 | M066_1626        |
| Bacteroides fragilis J 143 4     | PRJNA206102 | M067_1727        |
| Bacteroides fragilis J 38 1      | PRJNA206103 | M068_0191        |
|                                  |             | M068_1622        |
| Bacteroides fragilis S24L15      | PRJNA206166 | M132_1451        |
|                                  |             | M132_2481        |
| Bacteroides fragilis S24L26      | PRJNA206167 | M133_1503        |
|                                  |             | M133_2565        |
| Bacteroides fragilis YCH46       | PRJNA13067  | BF1566           |
|                                  |             | BF1634           |
|                                  |             | BF2685           |
| Bacteroides helcogenes P 36 108  | PRJNA41913  | Bache_1009       |
|                                  |             | Bache_1010       |
|                                  |             | Bache_1011       |
|                                  |             | Bache_2425       |
|                                  |             | Bache_2426       |
| Bacteroides intestinalis CAG 315 | PRJEB828    | BN604_01094      |

|                                           |             |                                                             |
|-------------------------------------------|-------------|-------------------------------------------------------------|
| Bacteroides intestinalis DSM 17393        | PRJNA20523  | BN604_02420<br>BACINT_00423<br>BACINT_00829<br>BACINT_03190 |
| Bacteroides massiliensis B84634 DSM 17679 | PRJNA170352 | HMPREF1534_02177                                            |
| Bacteroides oleiciplenus YIT 12058        | PRJNA46377  | HMPREF9447_05370                                            |
| Bacteroides ovatus SD CC 2a               | PRJNA47359  | CW1_1049                                                    |
| Bacteroides ovatus SD CMC 3f              | PRJNA42769  | CUY_2106                                                    |
| Bacteroides plebeius DSM 17135            | PRJNA27829  | BACPLE_01336                                                |
| Bacteroides pyogenes JCM 6292             | PRJDB556    | JCM6292_3817                                                |
| Bacteroides salyersiae CL02T12C01         | PRJNA64829  | HMPREF1071_01444<br>HMPREF1071_03696                        |
| Bacteroides thetaiotaomicron dnLKV9       | PRJNA175974 | C799_03772                                                  |
| Bacteroides thetaiotaomicron VPI 5482     | PRJNA399    | BT_3437                                                     |
| Bacteroides uniformis ATCC 8492           | PRJNA18195  | BACUNI_00959                                                |
| Bacteroides uniformis CAG 3               | PRJEB818    | BN594_02326                                                 |
| Bacteroides uniformis CL03T00C23          | PRJNA64833  | HMPREF1072_01167<br>HMPREF1072_03071<br>HMPREF1072_04153    |
| Bacteroides uniformis CL03T12C37          | PRJNA64835  | HMPREF1073_02064<br>HMPREF1073_03392<br>HMPREF1073_04081    |
| Bacteroides uniformis dnLKV2              | PRJNA175976 | C801_00210                                                  |
| Bacteroides vulgatus CL09T03C04           | PRJNA64837  | HMPREF1058_01764<br>HMPREF1058_01765                        |
| Bacteroides vulgatus dnLKV7               | PRJNA175975 | C800_03444                                                  |
| Bacteroides xylanisolvens SD CC 1b        | PRJNA47865  | CW3_1454                                                    |
| Bacteroides xylanisolvens XB1A            | PRJNA39177  | BXY_26810<br>BXY_27570                                      |
| Barnesiella intestinihominis YIT 11860    | PRJNA46375  | HMPREF9448_02774                                            |
| Chryseobacterium gleum ATCC 35910         | PRJNA30953  | HMPREF0204_11601                                            |
| Dokdonia donghaensis MED134               | PRJNA13544  | MED134_03544                                                |
| Elizabethkingia anophelis Ag1             | PRJNA77829  | EAAG1_10627                                                 |
| Elizabethkingia anophelis R26             | PRJNA178189 | D505_04224                                                  |
| Krokinobacter 4H 3 7 5                    | PRJNA62895  | Krodi_0142                                                  |
| Leeuwenhoekiella blandensis MED217        | PRJNA13573  | MED217_10914                                                |
| Mucilaginibacter paludis DSM 18603        | PRJNA43733  | Mucpa_5412                                                  |
| Parabacteroides D13                       | PRJNA38359  | HMPREF0619_03645                                            |
| Parabacteroides distasonis CL09T03C24     | PRJNA64885  | HMPREF1059_02732                                            |
| Parabacteroides merdae CL03T12C32         | PRJNA64891  | HMPREF1060_03364                                            |
| Paraprevotella xylaniphila YIT 11841      | PRJNA48503  | HMPREF9442_03422                                            |

## Chlamydiae (120/137)

|                                          |             |                    |
|------------------------------------------|-------------|--------------------|
| Pedobacter V48                           | PRJNA214790 | HMPREF9442_03423   |
| Porphyromonas endodontalis ATCC 35406    | PRJNA31385  | N824_23675         |
| Porphyromonas oral taxon 279 F0450       | PRJNA78907  | POREN0001_1212     |
| Prevotella ruminicola 23                 | PRJNA10619  | HMPREF1323_1106    |
| Solitalea canadensis DSM 3403            | PRJNA60421  | PRU_2520           |
|                                          |             | Solca_1704         |
|                                          |             | Solca_3841         |
| Sphingobacterium spiritivorum ATCC 33300 | PRJNA31529  | HMPREF0765_1250    |
| Zunongwangia profunda SM A87             | PRJNA38641  | ZPR_2061           |
| Chlamydia trachomatis A 363              | PRJEA71065  | A363_00159         |
| Chlamydia trachomatis A 5291             | PRJEA71067  | A5291_00158        |
| Chlamydophila psittaci Mat116            | PRJNA28637  | AO9_02945          |
| Chlamydia psittaci 84 55                 | PRJNA171856 | B595_0657          |
| Chlamydia psittaci MN                    | PRJNA171914 | B599_0612          |
| Chlamydia psittaci VS225                 | PRJNA171915 | B600_0655          |
| Chlamydia psittaci M56                   | PRJNA171917 | B602_0619          |
| Chlamydia psittaci WC                    | PRJNA171918 | B603_0619          |
| Chlamydophila psittaci CP3               | PRJNA172450 | B711_0655          |
| Chlamydophila psittaci NJ1               | PRJNA172451 | B712_0614          |
| Chlamydia trachomatis IU824              | PRJEB223    | BN197_1541         |
| Chlamydia trachomatis IU888              | PRJEB627    | BN442_1541         |
| Chlamydia trachomatis E Bour             | PRJEA71077  | BOUR_00160         |
| Chlamydophila felis Fe C 56              | PRJNA370    | CF0443             |
| Chlamydia muridarum MopnTet14            | PRJNA39295  | CmurM_010100002220 |
| Chlamydia muridarum Weiss                | PRJNA38161  | CmurW_010100002228 |
| Chlamydia psittaci 02DC14                | PRJNA77079  | CP02DC14_1040      |
| Chlamydia psittaci 02DC16                | PRJNA77083  | CP02DC16_1026      |
| Chlamydia psittaci 02DC21                | PRJNA77087  | CP02DC21_1006      |
| Chlamydia psittaci 02DC24                | PRJNA77093  | CP02DC24_0299      |
| Chlamydia psittaci 03DC29                | PRJNA77097  | CP03DC29_0722      |
| Chlamydia psittaci 03DC35                | PRJNA77101  | CP03DC35_1019      |
| Chlamydia psittaci 04DC42                | PRJNA77103  | CP04DC42_1020      |
| Chlamydophila pneumoniae AR39            | PRJNA247    | CP0593             |
| Chlamydia psittaci 09DC77                | PRJNA77109  | CP09DC77_1034      |
| Chlamydia psittaci 09DC79                | PRJNA77113  | CP09DC79_0747      |
| Chlamydia psittaci 84 8471 1             | PRJNA77033  | CP8484711_1340A    |
| Chlamydia psittaci 99DC5                 | PRJNA77075  | CP99DC5_1023       |
| Chlamydophila pneumoniae TW 183          | PRJNA420    | CpB0179            |
| Chlamydia psittaci C6 98                 | PRJNA77071  | CPC698_0917        |
| Chlamydia pecorum PV3056 3               | PRJNA175545 | CPE1_0549          |

|                                           |             |                     |
|-------------------------------------------|-------------|---------------------|
| Chlamydia pecorum W73                     | PRJNA175546 | CPE2_0549           |
| Chlamydia pecorum P787                    | PRJNA175547 | CPE3_0549           |
| Chlamydia pecorum IPTaLE                  | PRJNA229197 | CpecA_0811          |
| Chlamydia pecorum DBDeUG                  | PRJNA229199 | CpecF_0809          |
| Chlamydia pecorum MC MarsBar              | PRJNA229198 | CpecG_0809          |
| Chlamydia pecorum VR629                   | PRJNA229200 | CpecS_0807          |
| Chlamydomphila pneumoniae J138            | PRJNA257    | CPj0176             |
| Chlamydomphila pneumoniae LPCoLN          | PRJNA17947  | CPK_ORF00685        |
| Chlamydomphila pneumoniae CWL029          | PRJNA248    | CPn0176             |
| Chlamydomphila psittaci 01DC11            | PRJNA159527 | CPS0A_0617          |
| Chlamydomphila psittaci 02DC15            | PRJNA159521 | CPS0B_0614          |
| Chlamydomphila psittaci C19 98            | PRJNA159523 | CPS0C_0621          |
| Chlamydomphila psittaci 08DC60            | PRJNA159525 | CPS0D_0616          |
| Chlamydomphila psittaci RD1               | PRJEA60445  | Cpsi_5581           |
| Chlamydomphila psittaci 6BC               | PRJNA63621  | CPSIT_0608          |
| Chlamydia trachomatis D UW 3 CX           | PRJNA45     | CT_153              |
| Chlamydia trachomatis A HAR 13            | PRJNA13885  | CTA_0162            |
| Chlamydia trachomatis B TZ1A828 OT        | PRJEA32653  | CTB_1521            |
| Chlamydia trachomatis D EC                | PRJNA48087  | CTDEC_0153          |
| Chlamydia trachomatis D LC                | PRJNA48089  | CTDLC_0153          |
| Chlamydia trachomatis G 9301              | PRJNA45851  | CTG9301_00790       |
| Chlamydia trachomatis J 6276tet1          | PRJNA53863  | CTJTET1_00800       |
| Chlamydia trachomatis 434 Bu              | PRJNA28583  | CTL0408             |
| Chlamydia trachomatis L2c                 | PRJNA47581  | CTL2C_436           |
| Chlamydia trachomatis L2 434 Bu f         | PRJNA182165 | CTLFINAL_02150      |
| Chlamydia trachomatis L2 434 Bu i         | PRJNA182150 | CTLINITIAL_02150    |
| Chlamydia trachomatis L2b UCH 1 proctitis | PRJNA28585  | CTLon_0404          |
| Chlamydia trachomatis A2497               | PRJNA159993 | CTO_0162            |
| Chlamydia trachomatis 6276s               | PRJNA32185  | Ctra6_010100000785  |
| Chlamydia trachomatis 6276                | PRJNA32183  | Ctra62_010100000790 |
| Chlamydia trachomatis 70s                 | PRJNA32189  | Ctra7_010100000820  |
| Chlamydia trachomatis 70                  | PRJNA32187  | Ctra70_010100000805 |
| Chlamydia trachomatis D s 2923            | PRJNA32539  | CtraD_010100000810  |
| Chlamydia trachomatis L2tet1              | PRJNA39293  | CtraL_010100002315  |
| Chlamydia trachomatis RC J s 122          | PRJNA53859  | CTRC122_00815       |
| Chlamydia trachomatis RC L2 s 3           | PRJNA53855  | CTRC3_00815         |
| Chlamydia trachomatis RC F s 342          | PRJNA53857  | CTRC342_00820       |
| Chlamydia trachomatis RC L2 s 46          | PRJNA53847  | CTRC46_00805        |
| Chlamydia trachomatis RC L2 55            | PRJNA66013  | CTRC55_00805        |
| Chlamydia trachomatis RC F 69             | PRJNA53845  | CTRC69_00805        |
| Chlamydia trachomatis RC F s 852          | PRJNA53849  | CTRC852_00825       |



|                                   |             |                |
|-----------------------------------|-------------|----------------|
| Chlamydia trachomatis RC J 943    | PRJNA53851  | CTRC943_00795  |
| Chlamydia trachomatis RC J 953    | PRJNA53853  | CTRC953_00800  |
| Chlamydia trachomatis RC J 966    | PRJNA53861  | CTRC966_00810  |
| Chlamydia trachomatis RC J 971    | PRJNA66011  | CTRC971_00805  |
| Chlamydia trachomatis C TW 3      | PRJNA230246 | CTW3_00820     |
| Chlamydia trachomatis E 11023     | PRJNA43141  | E11023_00800   |
| Chlamydia trachomatis E 150       | PRJNA43143  | E150_00810     |
| Chlamydia trachomatis E C599      | PRJEA74569  | EC599_1581     |
| Chlamydia trachomatis E SW3       | PRJEA71079  | ESW3_1541      |
| Chlamydia trachomatis F SW4       | PRJEA71085  | FSW4_1541      |
| Chlamydia trachomatis F SW5       | PRJEA71087  | FSW5_1541      |
| Chlamydia trachomatis G 11074     | PRJNA43149  | G11074_00790   |
| Chlamydia trachomatis G 11222     | PRJNA43147  | G11222_00790   |
| Chlamydophila psittaci Cal10      | PRJNA62891  | G5Q_0588       |
| Chlamydophila pecorum E58         | PRJNA62893  | G5S_0929       |
| Chlamydia trachomatis G 9768      | PRJNA43145  | G9768_00790    |
| Chlamydia trachomatis B Jali20 OT | PRJEA32655  | JALI_1521      |
| Chlamydia trachomatis L1 115      | PRJEA71101  | L1115_00157    |
| Chlamydia trachomatis L1 224      | PRJEA71103  | L1224_00157    |
| Chlamydia trachomatis L1 440 LN   | PRJEA71099  | L1440_00157    |
| Chlamydia trachomatis L2 25667R   | PRJEA71105  | L225667R_00157 |
| Chlamydia trachomatis L2b 795     | PRJEA71115  | L2B795_00157   |
| Chlamydia trachomatis L2b 8200 07 | PRJEA71107  | L2B8200_00157  |
| Chlamydia trachomatis L2b Ams1    | PRJEA71117  | L2BAMS1_00157  |
|                                   |             | B602_0620      |
| Chlamydia trachomatis L2b Ams2    | PRJEA71119  | L2BAMS2_00157  |
| Chlamydia trachomatis L2b Ams3    | PRJEA71121  | L2BAMS3_00157  |
| Chlamydia trachomatis L2b Ams4    | PRJEA71123  | L2BAMS4_00157  |
| Chlamydia trachomatis L2b Ams5    | PRJEA71125  | L2BAMS5_00157  |
| Chlamydia trachomatis L2b Canada1 | PRJEA71457  | L2BCAN1_00158  |
| Chlamydia trachomatis L2b Canada2 | PRJEA71459  | L2BCAN2_00157  |
| Chlamydia trachomatis L2b CV204   | PRJEA71113  | L2BCV204_00157 |
| Chlamydia trachomatis             | PRJEA71111  | L2BLST_00157   |
| Chlamydia trachomatis L2b UCH 2   | PRJEA71109  | L2BUCH2_00157  |
| Chlamydia trachomatis L3 404 LN   | PRJEA71127  | L3404_00157    |
| Chlamydia suis MD56               | PRJNA221336 | Q499_0165      |
| Chlamydia trachomatis D SotonD1   | PRJEA71071  | SOTOND1_00157  |
| Chlamydia trachomatis D SotonD5   | PRJEA71073  | SOTOND5_00157  |
| Chlamydia trachomatis D SotonD6   | PRJEA71075  | SOTOND6_00157  |
| Chlamydia trachomatis             | PRJEA71081  | SOTONE4_00157  |
| Chlamydia trachomatis E SotonE8   | PRJEA71083  | SOTONE8_00157  |

|                          |                                         |             |                     |
|--------------------------|-----------------------------------------|-------------|---------------------|
|                          | Chlamydia trachomatis                   | PRJEA71089  | SOTONF3_00157       |
|                          | Chlamydia trachomatis G SotonG1         | PRJEA71091  | SOTONG1_00156       |
|                          | Chlamydia trachomatis Ia SotonIa1       | PRJEA71093  | SOTONIA1_00157      |
|                          | Chlamydia trachomatis                   | PRJEA71095  | SOTONIA3_00157      |
|                          | Chlamydia trachomatis K SotonK1         | PRJEA71097  | SOTONK1_00157       |
|                          | Chlamydia trachomatis Sweden2           | PRJEA43167  | SW2_1541            |
|                          | Chlamydia trachomatis F SWFPminus       | PRJEA74571  | SWFP_1631           |
|                          | Chlamydia muridarum Nigg                | PRJNA57785  | TC_0431             |
| Chlorobi (2/12)          |                                         |             |                     |
|                          | Chlorobium limicola DSM 245             | PRJNA12606  | Clim_0052           |
|                          | Chlorobium phaeobacteroides DSM 266     | PRJNA12609  | Cpha266_0063        |
| Cyanobacteria (4/129)    |                                         |             |                     |
|                          | Cyanothece PCC 7822                     | PRJNA28535  | Cyan7822_6553       |
|                          | Leptolyngbya PCC 7375                   | PRJNA43137  | Lepto7375DRAFT_7535 |
|                          | Lyngbya majuscula 3L                    | PRJNA60895  | LYNGBM3L_24480      |
|                          | Trichodesmium erythraeum IMS101         | PRJNA318    | Tery_0815           |
| Euryarchaeota (1/195)    |                                         |             |                     |
|                          | Halorubrum kocurii JCM 14978            | PRJNA174917 | C468_01225          |
| Firmicutes (6/6259)      |                                         |             |                     |
|                          | Clostridium CAG 307                     | PRJEB822    | BN598_00407         |
|                          |                                         |             | BN598_01207         |
|                          | Filifactor alocis ATCC 35896            | PRJNA30485  | HMPREF0389_01644    |
|                          | Lachnospiraceae bacterium 3 1           | PRJNA175981 | C806_02722          |
|                          | Lachnospiraceae bacterium 3 1 57FAA CT1 | PRJNA39383  | HMPREF0994_05290    |
|                          | Paenibacillus mucilaginosus 3016        | PRJNA77661  | PM3016_3694         |
|                          | Paenibacillus mucilaginosus KNP414      | PRJNA67335  | KNP414_04256        |
| Proteobacteria (21/6039) |                                         |             |                     |
|                          | Beggiatoa PS                            | PRJNA18683  | BGP_1327            |
|                          | Bradyrhizobium YR681                    | PRJNA83113  | PMI42_07046         |
|                          | Candidatus Entotheonella TSY2           | PRJNA230051 | ETSY2_16640         |
|                          | Chondromyces apiculatus DSM 436         | PRJNA167109 | A176_05694          |
|                          | Chondromyces apiculatus DSM 436         | PRJNA192263 | A176_3469           |
|                          | Marinomonas MED121                      | PRJNA13587  | MED121_03928        |
|                          | Myxococcus fulvus HW 1                  | PRJNA27837  | LILAB_21670         |
|                          | Photorhabdus asymbiotica ATCC 43949     | PRJNA59243  | PAU_02991           |
|                          | Photorhabdus luminescens laumondii TTO1 | PRJNA9605   | plu1415             |
|                          | Plesiocystis pacifica SIR 1             | PRJNA19341  | PPSIR1_00475        |
|                          | Pseudogulbenkiania ferrooxidans EGD HP2 | PRJNA215707 | O166_11535          |
|                          | Pseudomonas brassicacearum NFM421       | PRJEA63495  | PSEBR_a5064         |
|                          | Pseudomonas fluorescens F113            | PRJNA76715  | PSF113_1304         |
|                          | Pseudomonas fluorescens Q2 87           | PRJNA67535  | PflQ2_4938          |

|                      |                                      |             |                    |
|----------------------|--------------------------------------|-------------|--------------------|
|                      | Pseudomonas fluorescens Q8r1 96      | PRJNA67537  | PflQ8_5199         |
|                      | Pseudomonas fuscovaginae UPB0736     | PRJNA84441  | PfusU_010100000662 |
|                      | Serratia proteamaculans 568          | PRJNA17459  | Spro_2388          |
|                      | Skermanella stibioresistens SB22     | PRJNA214805 | N825_02095         |
|                      | Sulfurospirillum barnesii SES 3      | PRJNA63451  | Sulba_1023         |
|                      | Sulfurospirillum deleyianum DSM 6946 | PRJNA29529  | Sdel_1215          |
| Spirochaetes (1/315) | uncultured Thiohalocapsa PB PSB1     | PRJNA215075 | N838_01415         |
|                      | Spirochaeta smaragdinae DSM 11293    | PRJNA32637  | Spirs_3309         |
| Tenericutes (1/128)  | Acholeplasma palmae J233             | PRJEB1742   | BN85402230         |

**Table S3 - Clusters of MACPF domain containing proteins from Bacteroidetes strains with at least 99% identity among each cluster**

| cluster                       | genome                                  | MACPF domain gene | size (aa) | gi        |
|-------------------------------|-----------------------------------------|-------------------|-----------|-----------|
| <b>cluster A (29 genomes)</b> |                                         |                   |           |           |
|                               | <i>Bacteroides fragilis</i> 638R        | BF638R_1646       | 372       | 375357946 |
|                               | <i>Bacteroides fragilis</i> YCH46       | BF1634            | 372       | 53712924  |
|                               | <i>Bacteroides fragilis</i> 3 1 12      | BFAG_00974        | 372       | 313146153 |
|                               | <i>Bacteroides fragilis</i> 2 1 56FAA   | HMPREF1018_01740  | 372       | 336409237 |
|                               | <i>Bacteroides fragilis</i> CL07T00C01  | HMPREF1055_01288  | 372       | 423258088 |
|                               | <i>Bacteroides fragilis</i> CL07T12C05  | HMPREF1056_01634  | 372       | 423264944 |
|                               | <i>Bacteroides fragilis</i> I 1345      | M066_1626         | 372       | 596282837 |
|                               | <i>Bacteroides fragilis</i> B1 UDC16 1  | M069_1772         | 372       | 596123585 |
|                               | <i>Bacteroides fragilis</i> 2 F 2 5     | M077_1747         | 372       | 595897619 |
|                               | <i>Bacteroides fragilis</i> 1009 4 F 7  | M105_2100         | 372       | 596184650 |
|                               | <i>Bacteroides fragilis</i> 1009 4 F 10 | M106_1597         | 372       | 596179785 |
|                               | <i>Bacteroides fragilis</i> 3725 D9 v   | M107_2399         | 372       | 596099258 |
|                               | <i>Bacteroides fragilis</i> 3783N1 8    | M120_1906         | 372       | 596105509 |
|                               | <i>Bacteroides fragilis</i> S24L15      | M132_1451         | 372       | 596227992 |
|                               | <i>Bacteroides fragilis</i> S24L26      | M133_1503         | 372       | 596233194 |
|                               | <i>Bacteroides fragilis</i> 3 F 2 6     | M144_1629         | 372       | 596117941 |
|                               | <i>Bacteroides fragilis</i> 1007 1 F 5  | M148_1670         | 372       | 598884198 |
|                               | <i>Bacteroides fragilis</i> 1007 1 F 6  | M149_1805         | 372       | 598892530 |
|                               | <i>Bacteroides fragilis</i> J 143 4     | M067_1727         | 364       | 596045352 |
|                               | <i>Bacteroides fragilis</i> J 38 1      | M068_1622         | 364       | 596131568 |
|                               | <i>Bacteroides fragilis</i> 2 F 2 4     | M076_1635         | 364       | 596078823 |
|                               | <i>Bacteroides fragilis</i> 2 F 2 7     | M078_1667         | 364       | 595902282 |
|                               | <i>Bacteroides fragilis</i> 3996 N B 6  | M079_1648         | 364       | 595997100 |
|                               | <i>Bacteroides fragilis</i> 1007 1 F 7  | M100_1591         | 364       | 596072905 |
|                               | <i>Bacteroides fragilis</i> 1007 1 F 10 | M104_4085         | 364       | 596160913 |
|                               | <i>Bacteroides fragilis</i> 3719 T6     | M115_1539         | 364       | 596201381 |
|                               | <i>Bacteroides fragilis</i> 3976T8      | M123_1767         | 364       | 596111621 |
|                               | <i>Bacteroides fragilis</i> 3998T B 3   | M125_2032         | 364       | 596006232 |
|                               | <i>Bacteroides fragilis</i> 34 F 2 13   | M145_1554         | 359       | 595927946 |
| <b>cluster B (21 genomes)</b> |                                         |                   |           |           |
|                               | <i>Bacteroides fragilis</i> 638R        | BF638R_2714       | 506       | 375358975 |
|                               | <i>Bacteroides fragilis</i> YCH46       | BF2685            | 506       | 53713977  |
|                               | <i>Bacteroides fragilis</i> 2 1 16      | HMPREF0101_01895  | 506       | 265764327 |
|                               | <i>Bacteroides fragilis</i> 2 1 56FAA   | HMPREF1018_02853  | 506       | 336410356 |
|                               | <i>Bacteroides fragilis</i> CL07T00C01  | HMPREF1055_00045  | 506       | 423256845 |
|                               | <i>Bacteroides fragilis</i> CL07T12C05  | HMPREF1056_02880  | 506       | 423266190 |
|                               | <i>Bacteroides fragilis</i> 3996 N B 6  | M079_2797         | 506       | 595995905 |
|                               | <i>Bacteroides fragilis</i> 3397 T10    | M080_2450         | 506       | 595908723 |
|                               | <i>Bacteroides fragilis</i> 1007 1 F 7  | M100_2810         | 506       | 596071634 |
|                               | <i>Bacteroides fragilis</i> 1007 1 F 10 | M104_2757         | 506       | 596161846 |
|                               | <i>Bacteroides fragilis</i> 1009 4 F 7  | M105_3134         | 506       | 596183673 |
|                               | <i>Bacteroides fragilis</i> 1009 4 F 10 | M106_1841         | 506       | 596179494 |
|                               | <i>Bacteroides fragilis</i> 3725 D9 v   | M107_2891         | 506       | 596098974 |
|                               | <i>Bacteroides fragilis</i> 3397 T14    | M108_2648         | 506       | 596088191 |
|                               | <i>Bacteroides fragilis</i> 3397 N2     | M109_2574         | 506       | 596082827 |
|                               | <i>Bacteroides fragilis</i> S24L15      | M132_2481         | 506       | 596226905 |
|                               | <i>Bacteroides fragilis</i> S24L26      | M133_2565         | 506       | 596232110 |

|                               |                                           |                    |     |           |
|-------------------------------|-------------------------------------------|--------------------|-----|-----------|
|                               | <i>Bacteroides fragilis</i> 3 F 2 6       | M144_2717          | 506 | 596116817 |
|                               | <i>Bacteroides fragilis</i> 1007 1 F 5    | M148_2852          | 506 | 598880300 |
|                               | <i>Bacteroides fragilis</i> 1007 1 F 6    | M149_2962          | 506 | 598891202 |
|                               | <i>Bacteroides fragilis</i> 1007 1 F 8    | M101_2609          | 247 | 595889845 |
| <b>cluster C (12 genomes)</b> |                                           |                    |     |           |
|                               | <i>Bacteroides fragilis</i> YCH46         | BF1566             | 486 | 53712858  |
|                               | <i>Bacteroides fragilis</i> 3 2 5         | BSHG_0134          | 486 | 383117721 |
|                               | <i>Bacteroides fragilis</i> HMW 615       | HMPREF1204_03336   | 486 | 423284915 |
|                               | <i>Bacteroides fragilis</i> B1 UDC16 1    | M069_1710          | 486 | 596123523 |
|                               | <i>Bacteroides fragilis</i> 3725 D9 v     | M107_2338          | 486 | 596099197 |
|                               | <i>Bacteroides fragilis</i> 3986 T B 13   | M112_1592          | 486 | 596210719 |
|                               | <i>Bacteroides fragilis</i> 3986 N B 22   | M114_1392          | 486 | 596206604 |
|                               | <i>Bacteroides fragilis</i> 3719 A10      | M116_1647          | 486 | 596094037 |
|                               | <i>Bacteroides fragilis</i> 3976T8        | M123_1651          | 486 | 596111718 |
|                               | <i>Bacteroides fragilis</i> 3986 T B 9    | M083_1493          | 479 | 595979045 |
|                               | <i>Bacteroides fragilis</i> DS 71         | M073_1472          | 352 | 596031736 |
|                               | <i>Bacteroides fragilis</i> 3986T B 10    | M111_4148          | 187 | 595960642 |
| <b>cluster D (11 genomes)</b> |                                           |                    |     |           |
|                               | <i>Bacteroides dorei</i> CL03T12C01       | HMPREF1065_04347   | 559 | 423242619 |
|                               | <i>Bacteroides intestinalis</i> DSM 17393 | BACINT_00423       | 559 | 189464088 |
|                               | <i>Bacteroides plebeius</i> DSM 17135     | BACPLE_01336       | 559 | 198275178 |
|                               | <i>Bacteroides fragilis</i> 3 1 12        | BFAG_03570         | 559 | 313148745 |
|                               | <i>Bacteroides faecis</i> MAJ27           | BfaeM_010100023705 | 559 | 380696948 |
|                               | <i>Bacteroides xylanisolvens</i> D22      | HMPREF0106_02882   | 559 | 298482417 |
|                               | <i>Bacteroides eggerthii</i> 1 2 48FAA    | HMPREF1016_03647   | 559 | 317477434 |
|                               | <i>Parabacteroides merdae</i> CL03T12C32  | HMPREF1060_03364   | 559 | 423348007 |
|                               | <i>Bacteroides uniformis</i> CL03T00C23   | HMPREF1072_04153   | 559 | 423307215 |
|                               | <i>Bacteroides uniformis</i> CL03T12C37   | HMPREF1073_04081   | 559 | 423311363 |
|                               | <i>Bacteroides fragilis</i> B1 UDC16 1    | M069_5973          | 559 | 596126173 |
| <b>cluster E (8 genomes)</b>  |                                           |                    |     |           |
|                               | <i>Bacteroides xylanisolvens</i> 2 2 4    | BSCG_02855         | 549 | 237720387 |
|                               | <i>Bacteroides ovatus</i> SD CMC 3f       | CUY_2106           | 549 | 293370465 |
|                               | <i>Bacteroides ovatus</i> SD CC 2a        | CW1_1049           | 549 | 294646213 |
|                               | <i>Bacteroides xylanisolvens</i> SD CC 1b | CW3_1454           | 549 | 294809120 |
|                               | <i>Bacteroides xylanisolvens</i> 2 1 22   | HMPREF0102_00396   | 549 | 262405432 |
|                               | <i>Bacteroides xylanisolvens</i> D22      | HMPREF0106_01001   | 549 | 298480572 |
|                               | <i>Bacteroides xylanisolvens</i> 1 1 30   | HMPREF0127_02494   | 549 | 336404486 |
|                               | <i>Bacteroides xylanisolvens</i> D1       | BSAG_00140         | 360 | 345510621 |
| <b>cluster F (4 genomes)</b>  |                                           |                    |     |           |
|                               | <i>Bacteroides uniformis</i> ATCC 8492    | BACUNI_00959       | 656 | 160888542 |
|                               | <i>Bacteroides uniformis</i> CAG 3        | BN594_02326        | 658 | 524694523 |
|                               | <i>Bacteroides uniformis</i> 4 1 36       | HMPREF1007_00197   | 658 | 317477897 |
|                               | <i>Bacteroides uniformis</i> D20          | HMPREF0969_01421   | 651 | 270294900 |
| <b>cluster G (3 genomes)</b>  |                                           |                    |     |           |
|                               | <i>Bacteroides uniformis</i> dnLKV2       | C801_00210         | 508 | 507752131 |
|                               | <i>Bacteroides uniformis</i> CL03T00C23   | HMPREF1072_01167   | 508 | 423304228 |
|                               | <i>Bacteroides uniformis</i> CL03T12C37   | HMPREF1073_03392   | 508 | 423310658 |
| <b>cluster H (3 genomes)</b>  |                                           |                    |     |           |
|                               | <i>Bacteroides dorei</i> 9 1 42FAA        | BSBG_00813         | 491 | 237711430 |

**Table S4** – Agar overlay assay results of ability of strains listed in red font to secrete molecules that inhibits the growth of strains listed in blue font.

|               | Bf 638R      | Bf 638R pMCL140           | 638R pMCL177 (BF638R_2714) | Bf CM13 pMCL140      | Bf CM13 pMCL177 |              |              |              |
|---------------|--------------|---------------------------|----------------------------|----------------------|-----------------|--------------|--------------|--------------|
| Bf 12905      | +            | +                         | +                          |                      |                 |              |              |              |
| Bf CM13       | +            | +                         | +                          |                      |                 |              |              |              |
| Bf 9343       | +            | +                         | +                          |                      |                 |              |              |              |
| Bf CL03T12C07 | +            | +                         | +                          |                      |                 |              |              |              |
| Bf CL05T12C13 | +            | +                         | +                          |                      |                 |              |              |              |
| Bf US326      | +            | +                         | +                          |                      |                 |              |              |              |
|               |              |                           |                            |                      |                 |              |              |              |
|               | Bu ATCC 8492 | Bu pMCL178 (BACUNI_00905) | CM13 pMCL140               | CM13 pMCL178         |                 |              |              |              |
| Bf 12905      | slight       | slight                    |                            |                      |                 |              |              |              |
| Bf CM13       |              |                           |                            |                      |                 |              |              |              |
| Bf 9343       |              |                           |                            |                      |                 |              |              |              |
| Bf CL03T12C07 |              |                           |                            |                      |                 |              |              |              |
| Bf CL05T12C13 |              |                           |                            |                      |                 |              |              |              |
| Bf US326      |              |                           |                            |                      |                 |              |              |              |
| Bu CL03T12C16 | slight       | slight                    |                            |                      |                 |              |              |              |
| Bu CL06T06C18 | slight       | slight                    |                            |                      |                 |              |              |              |
| Bu CL07T00C16 | slight       | slight                    |                            |                      |                 |              |              |              |
| Bu CL09T06C01 |              |                           |                            |                      |                 |              |              |              |
| Bu CL10T00C10 |              |                           |                            |                      |                 |              |              |              |
| Bu CL12T00C13 |              |                           |                            |                      |                 |              |              |              |
| Bu CL12T12C47 |              |                           |                            |                      |                 |              |              |              |
| Bu CL14T09C07 | slight       | slight                    |                            |                      |                 |              |              |              |
|               |              |                           |                            |                      |                 |              |              |              |
|               | Bt VPI-5482  | Bt pMCL176 (BT_3120)      | Bt pMCL175 (BT_3437)       | Bt pMCL174 (BT_3439) | CM13 pMCL140    | CM13 pMCL176 | CM13 pMCL175 | CM13 pMCL174 |
| Bf 12905      | +            | +                         | +                          | +                    |                 |              |              |              |
| Bf CM13       |              |                           |                            |                      |                 |              |              |              |
| Bf 9343       |              |                           |                            |                      |                 |              |              |              |
| Bf CL03T12C07 |              |                           |                            |                      |                 |              |              |              |
| Bf CL05T12C13 |              |                           |                            |                      |                 |              |              |              |
| Bf US326      |              |                           |                            |                      |                 |              |              |              |
| Bt CL04T06C10 |              |                           |                            |                      |                 |              |              |              |
| Bt CL04T12C04 |              |                           |                            |                      |                 |              |              |              |
| Bt CL05T03C12 | slight       | slight                    | slight                     | slight               |                 |              |              |              |
| Bt CL06T03C18 |              |                           |                            |                      |                 |              |              |              |
| Bt CL06T12C08 |              |                           |                            |                      |                 |              |              |              |
| Bt CL07T03C06 |              |                           |                            |                      |                 |              |              |              |
| Bt CL07T12C01 |              |                           |                            |                      |                 |              |              |              |
| Bt CL08T00C07 |              |                           |                            |                      |                 |              |              |              |
| Bt CL08T06C15 |              |                           |                            |                      |                 |              |              |              |
| Bt CL09T03C10 |              |                           |                            |                      |                 |              |              |              |
| Bt CL10T00C23 |              |                           |                            |                      |                 |              |              |              |
| Bt CL10T12C19 |              |                           |                            |                      |                 |              |              |              |
| Bt CL11T00C19 |              |                           |                            |                      |                 |              |              |              |
| Bt CL11T12C02 |              |                           |                            |                      |                 |              |              |              |
| Bt CL12T00C04 |              |                           |                            |                      |                 |              |              |              |
| Bt CL12T12C02 |              |                           |                            |                      |                 |              |              |              |
| Bt CL13T03C02 |              |                           |                            |                      |                 |              |              |              |
| Bt CL13T12C04 |              |                           |                            |                      |                 |              |              |              |
| Bt CL15T03C05 |              |                           |                            |                      |                 |              |              |              |
| Bt CL15T12C11 |              |                           |                            |                      |                 |              |              |              |

Results are only shown for those strains that are growth inhibited (+/slight). Blank cells are equivalent to no inhibitory activity.

**Table S5.** Primers used in this study

| Purpose                           | Primer              | Primer sequence <sup>a</sup>                                     |
|-----------------------------------|---------------------|------------------------------------------------------------------|
| Sequencing out of tn junction     |                     | GACTTGGATACCTCACGCC                                              |
| Cloning of BF1646                 | forward             | GTTTGGATCCGGTTTTGCTTGGTATTTTCATTTG                               |
|                                   | reverse             | ACGAGGATCCAGAAAAGCCCTGTATAAAAAGCA                                |
| Cloning of His-BF1646             | forward             | AGAACATATGACTAATGATGATTTTTCTGTATTACAGGAAAATGAAGA                 |
|                                   | reverse             | GATTCATATGTTATGGTCTCCTATAAGTACTTCTATTTCCATTAG                    |
| Cloning of BT_3120                | forward             | CGATGGATCCTTCTCATTCCCTTTTATCTACCTTTAGC                           |
|                                   | reverse             | TTCCGGATCCGGTATGGCCTTATGCTTATACCTT                               |
| Cloning of BT_3437                | forward             | AGTAGGATCCACCAAAGTATCAACCATAAGAAACATGA                           |
|                                   | reverse             | GTAAGGATCCGTGTTTTAGCGATTATCCTCAATG                               |
| Cloning of BT_3439                | forward             | GAAGGGATCCCTTTTTAAATTATACGCAAATGAAGAAG                           |
|                                   | reverse             | ACATGGATCCGGAACATTAATTCTGTTTATTGTTACTACA                         |
| Cloning of BACUNI_00959           | forward             | TTAGGATCCTTATAACAATCATAACAACAACATACATTA                          |
|                                   | reverse             | TTCCGGATCCAAGTTATCTCTAACACATTGGTACACCTT                          |
| Cloning of BF638R_2714            | forward             | TATGGATCCCCACCTACCTTTGCAAACAGTTAT                                |
|                                   | reverse             | CTGCGGATCCGCCCTTCTTATTGTATTGTATCGTC                              |
| Creation of $\Delta$ BF1646       | left flank forward  | TACTGGATCCGAGTACGCTGAACGCATCAT                                   |
|                                   | left flank reverse  | CGATACGCGTAAGCGGCAAATGTGAATAGC                                   |
|                                   | right flank forward | GGTAACGCGTCGAGTTATTGGGGCTAATGG                                   |
|                                   | right flank reverse | ATGAGGATCCCGCGTTTCGTGATGTGAGTA                                   |
| Creation of site-directed mutants | VL>AA forward       | CTTTTATTATTCAACATTATGGGACACATGCAGCAACTGATATTACTTTGGGAGGAAGAATAAC |
|                                   | VL>AA reverse       | GTTATTCTTCCTCCCAAAGTAATATCAGTTGCTGCATGTGTCCATAATGTTGAATAATAAAAAG |
|                                   | W>A forward         | TCTAAAAATCCATCCGTAATTGATATATCATCAGCGCAACAGAGTTGTGATG             |
|                                   | W>A reverse         | CATCACAACCTCTGTTGCGCTGATGATATATCAATTACGGATGGATTTT TAGA           |

<sup>a</sup> Restriction sites are underlined.
